# Supplementary material
Source: PubMed Central journal article supplement (PMC3302968)
Supplement: NIHMS344637-supplement-Supp_Table_S1.pdf [file NIHMS344637-supplement-Supp_Table_S1.pdf]

**Table S1. RNAi screen results**

| Gene / control                                     | CG number | Functional Group                               | % internalized bacteria | p-value | normalized % internalization | p-value normalized |
|----------------------------------------------------|-----------|------------------------------------------------|-------------------------|---------|------------------------------|--------------------|
| Untreated cells (no RNAi) + <i>R. parkeri</i>      | -----     | -----                                          | 54 ± 10                 | -----   | 1 ± 0.09                     | -----              |
| Untreated cells + <i>Rp</i> , fixed at time=0      | -----     | <i>negative control</i>                        | 19 ± 9                  | <0.0001 | 0.36 ± 0.18                  | <0.0001            |
| Untreated cells + <i>Rp</i> , 4mM latrunculin A    | -----     | <i>negative control</i>                        | 15 ± 5                  | <0.0001 | 0.33 ± 0.13                  | <0.0001            |
| Untreated cells + 56C Heat-killed <i>R.parkeri</i> | -----     | <i>negative control</i>                        | 23 ± 8                  | <0.0001 | 0.48 ± 0.1                   | <0.0001            |
| Untreated cells + <i>Listeria monocytogenes</i>    | -----     | <i>negative control</i>                        | 24 ± 5                  | <0.0001 | 0.41 ± 0.05                  | <0.0001            |
| Untreated cells + <i>E. coli</i> XL-10             | -----     | <i>negative control</i>                        | 5 ± 6                   | <0.0001 | 0.09 ± 0.09                  | <0.0001            |
| Abi                                                | CG9749    | WAVE complex subunit                           | 17 ± 10                 | <0.0001 | 0.34 ± 0.18                  | <0.0001            |
| Abl                                                | CG4032    | Kinase                                         | 42 ± 10                 | 0.0431  | 0.86 ± 0.06                  | 0.0068             |
| ADF/cofilin                                        | CG6873    | Actin monomer dynamics                         | 51 ± 13                 | 0.5961  | 0.99 ± 0.16                  | 0.7844             |
| Aip1                                               | CG10724   | Actin monomer dynamics                         | 47 ± 9                  | 0.2366  | 1.06 ± 0.09                  | 0.2799             |
| α-actinin                                          | CG4376    | Actin filament bundling/organizing             | 34 ± 14                 | 0.0004  | 0.71 ± 0.19                  | <0.0001            |
| α-actinin 3                                        | CG8953    | Actin filament bundling/organizing             | 51 ± 7                  | 0.5532  | 0.85 ± 0.12                  | 0.0056             |
| Anillin                                            | CG2092    | Actin filament binding / cytokinesis           | 57 ± 4                  | 0.6946  | 0.98 ± 0.06                  | 0.6766             |
| Arp2/3 complex ARP3                                | CG7558    | Actin filament nucleator                       | 34 ± 9                  | 0.0002  | 0.67 ± 0.07                  | <0.0001            |
| Arp2/3 complex ARP2                                | CG9901    | Actin filament nucleator                       | 29 ± 9                  | <0.0001 | 0.59 ± 0.15                  | <0.0001            |
| Arp2/3 complex ARPC1                               | CG8978    | Actin filament nucleator                       | 33 ± 16                 | 0.0013  | 0.66 ± 0.25                  | <0.0001            |
| Arp2/3 complex ARPC2                               | CG10954   | Actin filament nucleator                       | 30 ± 9                  | <0.0001 | 0.63 ± 0.21                  | <0.0001            |
| Arp2/3 complex ARPC3                               | CG4560    | Actin filament nucleator                       | 51 ± 8                  | 0.5061  | 1.05 ± 0.19                  | 0.3124             |
| Arp2/3 complex ARPC4                               | CG5972    | Actin filament nucleator                       | 36 ± 12                 | 0.001   | 0.61 ± 0.22                  | <0.0001            |
| Arp2/3 complex ARPC5                               | CG9881    | Actin filament nucleator                       | 25 ± 6                  | <0.0001 | 0.5 ± 0.04                   | <0.0001            |
| Band 4.1 FERM-like                                 | CG34347   | Membrane-cytoskeleton linker                   | 42 ± 9                  | 0.019   | 0.95 ± 0.14                  | 0.2692             |
| Basket (c-Jun N-terminal kinase)                   | CG5680    | Kinase                                         | 56 ± 7                  | 0.7782  | 0.97 ± 0.17                  | 0.6022             |
| By blistery tensin                                 | CG9379    | Membrane-cytoskeleton linker / focal adhesions | 49 ± 14                 | 0.397   | 0.97 ± 0.15                  | 0.5125             |
| CAP1                                               | CG5061    | Actin monomer dynamics / filament binding      | 40 ± 4                  | 0.0211  | 1.02 ± 0.3                   | 0.708              |

|                        |         |                                                    |         |        |             |         |
|------------------------|---------|----------------------------------------------------|---------|--------|-------------|---------|
| Capping protein (beta) | CG17158 | Actin monomer dynamics / filament binding          | 41 ± 12 | 0.0142 | 0.87 ± 0.18 | 0.0088  |
| Cappucino              | CG3399  | Actin filament nucleator                           | 51 ± 22 | 0.6488 | 0.93 ± 0.33 | 0.2241  |
| Cdc42                  | CG12530 | Rho family GTPases                                 | 48 ± 8  | 0.2047 | 1.02 ± 0.05 | 0.7433  |
| Citron kinase          | CG10522 | Kinase                                             | 39 ± 12 | 0.0156 | 0.8 ± 0.11  | 0.0003  |
| Cofilin (twinstar)     | CG4254  | Actin monomer dynamics                             | 40 ± 12 | 0.0088 | 0.8 ± 0.09  | <0.0001 |
| Coracle                | CG11949 | Membrane-cytoskeleton linker                       | 62 ± 5  | 0.2264 | 0.94 ± 0.06 | 0.2558  |
| Coronin                | CG9446  | Arp2/3 complex regulator                           | 53 ± 15 | 0.7956 | 1.03 ± 0.2  | 0.6399  |
| Cortactin              | CG3637  | Arp2/3 complex regulator                           | 43 ± 15 | 0.0669 | 0.87 ± 0.18 | 0.0144  |
| Cyclin-dep kinase 5    | CG8203  | Kinase                                             | 59 ± 2  | 0.4054 | 1.05 ± 0.09 | 0.3399  |
| Dab (disabled)         | CG9695  | Adapter / WASP regulator                           | 66 ± 5  | 0.0506 | 1.09 ± 0.13 | 0.1033  |
| Dah                    | CG6157  | Membrane-cytoskeleton linker / cortical furrow     | 55 ± 12 | 0.858  | 1.17 ± 0.08 | 0.0003  |
| Dcarmil                | CG1399  | Arp2/3 complex regulator                           | 52 ± 17 | 0.7566 | 0.89 ± 0.12 | 0.0301  |
| Diaphanous             | CG1768  | Actin filament nucleator                           | 54 ± 14 | 0.9939 | 0.93 ± 0.06 | 0.1633  |
| DLAR                   | CG10443 | Tyrosine phosphatase                               | 59 ± 9  | 0.4422 | 1.05 ± 0.29 | 0.3746  |
| Drebrin-like           | CG10083 | Actin filament binding / endocytosis               | 62 ± 17 | 0.2443 | 1.05 ± 0.08 | 0.3076  |
| Drk                    | CG6033  | Adapter/ WAVE complex subunit                      | 44 ± 9  | 0.0863 | 0.96 ± 0.04 | 0.4541  |
| DROK                   | CG9774  | Kinase                                             | 39 ± 3  | 0.0138 | 0.88 ± 0.14 | 0.0272  |
| E-cadherin (shotgun)   | CG3722  | Membrane-cytoskeleton linker / cell-cell junctions | 59 ± 9  | 0.4101 | 0.96 ± 0.11 | 0.3906  |
| Enabled (Ena)          | CG15112 | Actin monomer dynamics / filament binding          | 57 ± 13 | 0.7007 | 0.98 ± 0.17 | 0.6929  |
| Fascin                 | CG1536  | Actin filament bundling/organizing                 | 56 ± 16 | 0.7845 | 0.98 ± 0.24 | 0.7512  |
| Filamin                | CG3937  | Actin filament bundling/organizing                 | 57 ± 4  | 0.6544 | 0.93 ± 0.11 | 0.1922  |
| Fimbrin                | CG8649  | Actin filament bundling/organizing                 | 38 ± 6  | 0.0078 | 0.86 ± 0.05 | 0.0055  |
| Forked                 | CG5424  | Actin filament bundling/organizing                 | 49 ± 7  | 0.3574 | 0.8 ± 0.12  | 0.0002  |
| Formin/DIA-like        | CG14622 | Actin filament nucleator                           | 59 ± 8  | 0.4736 | 0.95 ± 0.07 | 0.3161  |
| Form 3                 | CG33556 | Actin filament nucleator                           | 45 ± 12 | 0.1229 | 0.92 ± 0.11 | 0.1347  |
| Formin FRL group       | CG32138 | Actin filament nucleator                           | 44 ± 21 | 0.1143 | 0.87 ± 0.31 | 0.037   |

|                           |         |                                                |         |         |             |         |
|---------------------------|---------|------------------------------------------------|---------|---------|-------------|---------|
| Formin FHOD3 group        | CG32030 | Actin filament nucleator                       | 46 ± 8  | 0.1612  | 0.96 ± 0.08 | 0.3847  |
| Gelsolin                  | CG1106  | Actin monomer dynamics                         | 55 ± 9  | 0.8639  | 0.91 ± 0.15 | 0.0758  |
| Genghis Kahn              | CG4012  | Cdc42 effector                                 | 54 ± 8  | 0.9626  | 0.94 ± 0.06 | 0.2302  |
| Hemipterous               | CG4353  | Map kinase kinase                              | 65 ± 10 | 0.0848  | 0.99 ± 0.13 | 0.8308  |
| Hip1R                     | CG10971 | endocytic / phagocytic adapter protein         | 35 ± 7  | 0.0005  | 0.74 ± 0.17 | <0.0001 |
| HSPC300                   | CG30173 | WAVE complex subunit                           | 58 ± 6  | 0.5415  | 1.01 ± 0.07 | 0.8098  |
| Kelch                     | CG7210  | Actin filament binding / ring canals           | 52 ± 11 | 0.7108  | 0.85 ± 0.14 | 0.006   |
| Kette HEM-protein         | CG5837  | WAVE complex subunit                           | 31 ± 9  | <0.0001 | 0.57 ± 0.24 | <0.0001 |
| Ku70                      | CG5247  | Mammalian receptor for <i>R. conori</i> entry  | 42 ± 16 | 0.0263  | 0.83 ± 0.16 | 0.0005  |
| Lethal (2) giant larvae   | CG2671  | Membrane-cytoskeleton linker                   | 56 ± 2  | 0.7352  | 1.01 ± 0.08 | 0.9133  |
| Lim kinase                | CG1848  | Actin binding kinase                           | 61 ± 12 | 0.3031  | 0.99 ± 0.15 | 0.882   |
| Merlin                    | CG14228 | Membrane-cytoskeleton linker                   | 48 ± 15 | 0.2916  | 0.81 ± 0.11 | 0.0005  |
| MIM homolog               | CG33558 | Membrane-cytoskeleton linker                   | 33 ± 8  | 0.0001  | 0.69 ± 0.21 | <0.0001 |
| Moesin                    | CG10701 | Membrane-cytoskeleton linker                   | 40 ± 4  | 0.0183  | 0.83 ± 0.16 | 0.0015  |
| Mtl (rac-like)            | CG5588  | Rho family GTPases                             | 48 ± 4  | 0.3279  | 1.1 ± 0.15  | 0.0725  |
| Mushroom bodies tiny      | CG18582 | Kinase                                         | 62 ± 8  | 0.1905  | 1.01 ± 0.05 | 0.8091  |
| Myoblast city             | CG10379 | Membrane-cytoskeleton linker / focal adhesions | 38 ± 4  | 0.0089  | 0.87 ± 0.11 | 0.011   |
| Myosin IA                 | CG7438  | Myosin / phagocytosis                          | 28 ± 12 | <0.0001 | 0.62 ± 0.37 | <0.0001 |
| Myosin IB                 | CG9155  | Myosin                                         | 48 ± 9  | 0.306   | 0.85 ± 0.06 | 0.0032  |
| Myosin II (zipper)        | CG15792 | Myosin / phagocytosis                          | 33 ± 6  | 0.0002  | 0.72 ± 0.27 | <0.0001 |
| Myosin V                  | CG2146  | Myosin                                         | 47 ± 9  | 0.216   | 1.01 ± 0.09 | 0.9136  |
| Myosin VI                 | CG5695  | Myosin                                         | 54 ± 16 | 0.9636  | 1.19 ± 0.18 | 0.0006  |
| Myosin VII                | CG7595  | Myosin                                         | 51 ± 11 | 0.5934  | 0.82 ± 0.09 | 0.0006  |
| Myosin VII (28B)          | CG6976  | Myosin                                         | 67 ± 3  | 0.0342  | 1.09 ± 0.12 | 0.0901  |
| Myosin XV                 | CG2174  | Myosin                                         | 66 ± 4  | 0.0567  | 1.08 ± 0.14 | 0.1529  |
| Myosin XVIII (PDZ-myosin) | CG10218 | Myosin                                         | 47 ± 10 | 0.2597  | 1.06 ± 0.17 | 0.2461  |

|               |         |                                                    |         |        |             |         |
|---------------|---------|----------------------------------------------------|---------|--------|-------------|---------|
| Myosin 29D XX | CG10595 | Myosin                                             | 67 ± 10 | 0.0471 | 1.11 ± 0.09 | 0.0312  |
| Nck           | CG3727  | Adapter/ WAVE complex subunit                      | 54 ± 12 | 0.8843 | 0.89 ± 0.13 | 0.0178  |
| Null0         | CG14426 | Membrane-cytoskeleton linker / basal junctions     | 57 ± 5  | 0.64   | 0.93 ± 0.09 | 0.1032  |
| Ovarian tumor | CG12743 | Actin filament bundling/organizing                 | 55 ± 10 | 0.8567 | 0.93 ± 0.16 | 0.12    |
| Pak1 kinase   | CG10295 | Kinase                                             | 55 ± 8  | 0.8561 | 0.96 ± 0.19 | 0.4252  |
| PKN           | CG2049  | Rho, Rac1 kinase                                   | 61 ± 8  | 0.2083 | 1.02 ± 0.17 | 0.6535  |
| POD-1/coronin | CG4532  | Arp2/3 complex regulator                           | 46 ± 15 | 0.1467 | 0.88 ± 0.09 | 0.0083  |
| Pp2A          | CG17291 | Phosphatase                                        | 52 ± 8  | 0.6327 | 0.87 ± 0.13 | 0.0055  |
| Profilin      | CG9553  | Actin monomer dynamics                             | 45 ± 5  | 0.0668 | 0.87 ± 0.1  | 0.0055  |
| Pten          | CG5671  | Membrane-cytoskeleton linker / ring canals         | 52 ± 14 | 0.713  | 0.87 ± 0.18 | 0.0148  |
| Quail         | CG6433  | Actin monomer dynamics                             | 60 ± 7  | 0.2158 | 1.03 ± 0.06 | 0.4976  |
| Rab5          | CG3664  | Rab family GTPase                                  | 53 ± 14 | 0.7785 | 0.91 ± 0.22 | 0.0734  |
| Rac1          | CG2248  | Rho family GTPases                                 | 37 ± 17 | 0.0021 | 0.84 ± 0.5  | 0.0237  |
| Rac2          | CG8556  | Rho family GTPases                                 | 37 ± 8  | 0.002  | 0.77 ± 0.09 | <0.0001 |
| RacGAP50C     | CG13345 | GAP for Rac GTPase                                 | 65 ± 14 | 0.0532 | 1.12 ± 0.06 | 0.0116  |
| Rho1          | CG8416  | Rho family GTPases                                 | 43 ± 4  | 0.0277 | 0.89 ± 0.11 | 0.0142  |
| RhoBTB        | CG5701  | Rho family GTPases                                 | 60 ± 2  | 0.2575 | 1.01 ± 0.02 | 0.8836  |
| RhoL          | CG9366  | Rho family GTPases                                 | 44 ± 7  | 0.0612 | 0.76 ± 0.12 | <0.0001 |
| Rhopilin      | CG8497  | Rho GTPase effector                                | 56 ± 6  | 0.7812 | 0.93 ± 0.12 | 0.1205  |
| Slingshot     | CG6238  | Phosphatase of cofilin                             | 44 ± 15 | 0.1039 | 0.96 ± 0.18 | 0.4078  |
| Spire         | CG10076 | Actin filament nucleator                           | 50 ± 9  | 0.4491 | 0.91 ± 0.13 | 0.0394  |
| Sra-1         | CG4931  | WAVE complex subunit                               | 35 ± 6  | 0.0027 | 0.55 ± 0.07 | <0.0001 |
| Taf110        | CG5444  | DNA binding, cytokinesis                           | 39 ± 7  | 0.0124 | 0.81 ± 0.09 | 0.0005  |
| Talin         | CG6831  | Membrane-cytoskeleton linker / cell-cell junctions | 48 ± 15 | 0.2377 | 0.95 ± 0.17 | 0.2818  |
| Trio (GEF)    | CG18214 | GEF for Rho GTPases                                | 48 ± 9  | 0.2236 | 0.91 ± 0.17 | 0.0593  |
| Tropomodulin  | CG1539  | Actin monomer dynamics / filament binding          | 57 ± 12 | 0.5516 | 0.98 ± 0.09 | 0.5323  |

|                |                  |                                                |         |         |             |         |
|----------------|------------------|------------------------------------------------|---------|---------|-------------|---------|
| Tropomyosin1   | CG4898           | Actin monomer dynamics                         | 52 ± 9  | 0.6681  | 0.86 ± 0.09 | 0.0028  |
| Tropomyosin2   | CG4843           | Actin monomer dynamics                         | 43 ± 13 | 0.0451  | 0.72 ± 0.19 | <0.0001 |
| Twinfillin     | CG3172           | Actin monomer dynamics                         | 53 ± 8  | 0.8331  | 0.89 ± 0.15 | 0.0325  |
| Vav            | CG7893           | GEF for Rac1 GTPase                            | 41 ± 6  | 0.0319  | 0.69 ± 0.16 | <0.0001 |
| Villin-like    | CG33232          | Actin monomer dynamics                         | 60 ± 6  | 0.3213  | 1.01 ± 0.04 | 0.8604  |
| Vinculin       | CG3299           | Membrane-cytoskeleton linker / focal adhesions | 41 ± 17 | 0.0379  | 0.76 ± 0.17 | <0.0001 |
| WASP           | CG1520           | Arp2/3 Nucleation Promoting Factor             | 49 ± 16 | 0.3635  | 0.99 ± 0.16 | 0.8127  |
| WAVE (SCAR)    | CG4636           | Arp2/3 Nucleation Promoting Factor             | 18 ± 6  | <0.0001 | 0.38 ± 0.08 | <0.0001 |
| WIP veroprolin | CG13503          | WASP binding, regulation                       | 38 ± 16 | 0.005   | 0.78 ± 0.34 | 0.0003  |
| Rac1 + Cdc42   | CG2248 + CG12530 | Rho family GTPases                             | 34 ± 5  | 0.0003  | 0.68 ± 0.11 | <0.0001 |
| Rac1 + Rac2    | CG2248 + CG8556  | Rho family GTPases                             | 39 ± 18 | 0.0031  | 0.84 ± 0.46 | 0.0162  |

Column A, common gene name. Column B, FlyBase gene annotation symbol. Column C, type of control or protein function. Column D, raw percentage of internalized *R. parkeri* expressed as mean ± standard deviation,  $n > 3$  biological replicates. Column E, p-value based on a pairwise comparison of the raw percentages of internalized bacteria for RNAi treated cells versus untreated control cells using the Student's t-test, with  $p < 0.05$  considered statistically significant. Column F, percentage of internalized *R. parkeri* normalized to the mean value for untreated control cells ( $n = 2$ ) in the same day's experiment, expressed as mean ± standard deviation. Column G, p-value based on a pairwise comparison of the normalized percentages of internalized bacteria for RNAi treated cells versus normalized untreated control cells using the Student's t-test, with  $p < 0.05$  considered statistically significant. Red signifies those targets for which values were significantly reduced compared with controls, while green signifies those targets for which values were significantly increased when compared with controls. Functional classification derived from: <http://www.ihop-net.org>; <http://flybase.org>; Siripala and Welch 2007, Cell 128:626; Siripala and Welch 2007 Cell 128:1014
